# Supplementary material for: The AppNL-G-F mouse retina is a site for preclinical Alzheimer’s disease diagnosis and research
Source: PubMed Central journal article supplement (PMC7788955; doi:10.1186/s40478-020-01102-5), 2021-01-06
Supplement: 40478_2020_1102_MOESM1_ESM.pdf [file 40478_2020_1102_MOESM1_ESM.pdf]

## Supplementary information

### **The *App<sup>NL-G-F</sup>* mouse retina is a site for preclinical Alzheimer's disease diagnosis and research**

Marjan Vandenabeele<sup>1,2</sup>, Lien Veys<sup>1,2</sup>, Sophie Lemmens<sup>3</sup>, Xavier Hadoux<sup>4</sup>, Géraldine Gelders<sup>1,2</sup>, Luca Masin<sup>1,2</sup>, Lutgarde Serneels<sup>2,5</sup>, Jan Theunis<sup>6</sup>, Takashi Saito<sup>7,8</sup>, Takaomi C. Saido<sup>7</sup>, Murali Jayapala<sup>9</sup>, Patrick De Boever<sup>6,10</sup>, Bart De Strooper<sup>2,5</sup>, Ingeborg Stalmans<sup>3</sup>, Peter van Wijngaarden<sup>4</sup>, Lieve Moons<sup>1,2</sup>, Lies De Groef<sup>1,2\*</sup>

<sup>1</sup>KU Leuven, Neural Circuit Development and Regeneration Research Group, Department of Biology, Leuven, Belgium

<sup>2</sup>Leuven Brain Institute, Leuven, Belgium

<sup>3</sup>University Hospitals Leuven, Department of Ophthalmology, Leuven, Belgium; KU Leuven, Research Group Ophthalmology, Department of Neurosciences, Leuven, Belgium

<sup>4</sup>Centre for Eye Research Australia, Royal Victorian Eye and Ear Hospital, East Melbourne, Australia; Ophthalmology, Department of Surgery, University of Melbourne, Parkville, Australia

<sup>5</sup>VIB Center for Brain & Disease Research, Leuven, Belgium; KU Leuven, Laboratory for the Research of Neurodegenerative Diseases, Department of Neurosciences, Leuven, Belgium

<sup>6</sup>VITO (Flemish Institute for Technological Research), Health Unit, Mol, Belgium

<sup>7</sup>Laboratory for Proteolytic Neuroscience, RIKEN Center for Brain Science, Saitama, Japan

<sup>8</sup>Department of Neurocognitive Science, Institute of Brain Science, Nagoya City University Graduate School of Medical Sciences, Japan

<sup>9</sup>Imec (Interuniversity Microelectronics Centre), Leuven, Belgium

<sup>10</sup>Hasselt University, Center of Environmental Sciences, Diepenbeek, Belgium; University of Antwerp, Department of Biology, Wilrijk, Belgium

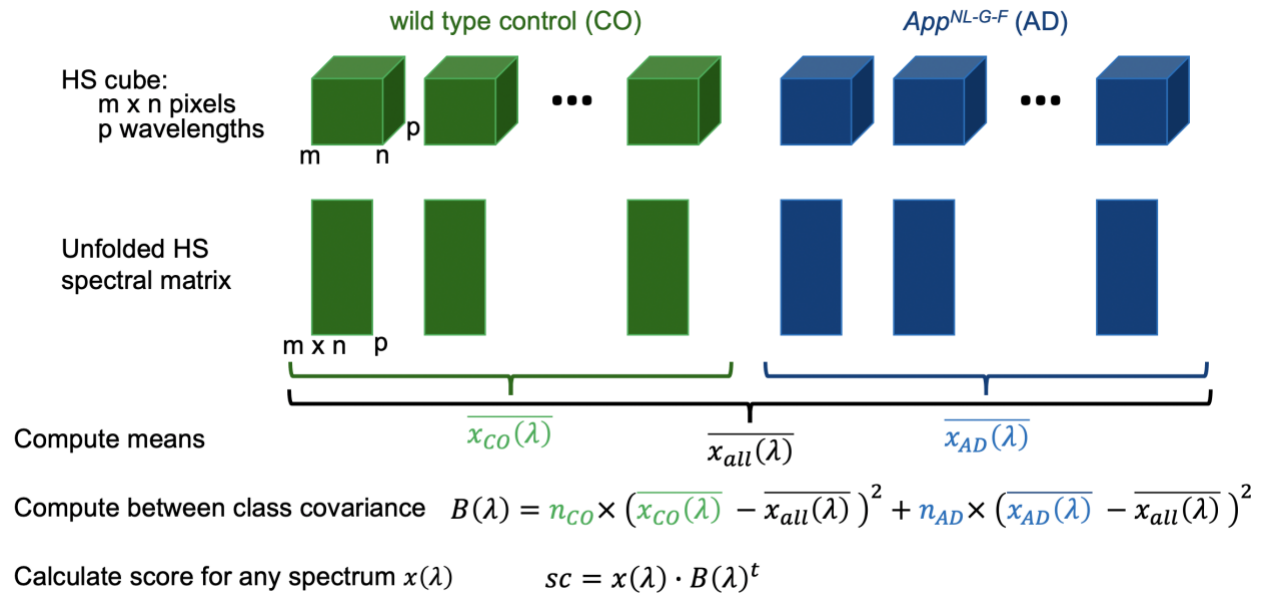

**Supplementary figure 1.** Schematic overview of the hyperspectral imaging data analysis. Spectral data from all mice were stacked in a matrix and a corresponding class label (AD or wild type control [CO]) was given for each entry. The between class covariance spectrum was calculated. This spectrum corresponds to the average spectral difference between AD and CO groups. The hyperspectral score for a given spectral pixel was obtained by calculating the dot product between its spectral data and the between class covariance spectrum. The average spectral score for a given mouse was calculated using all pixels of all the HS images collected for that retina.

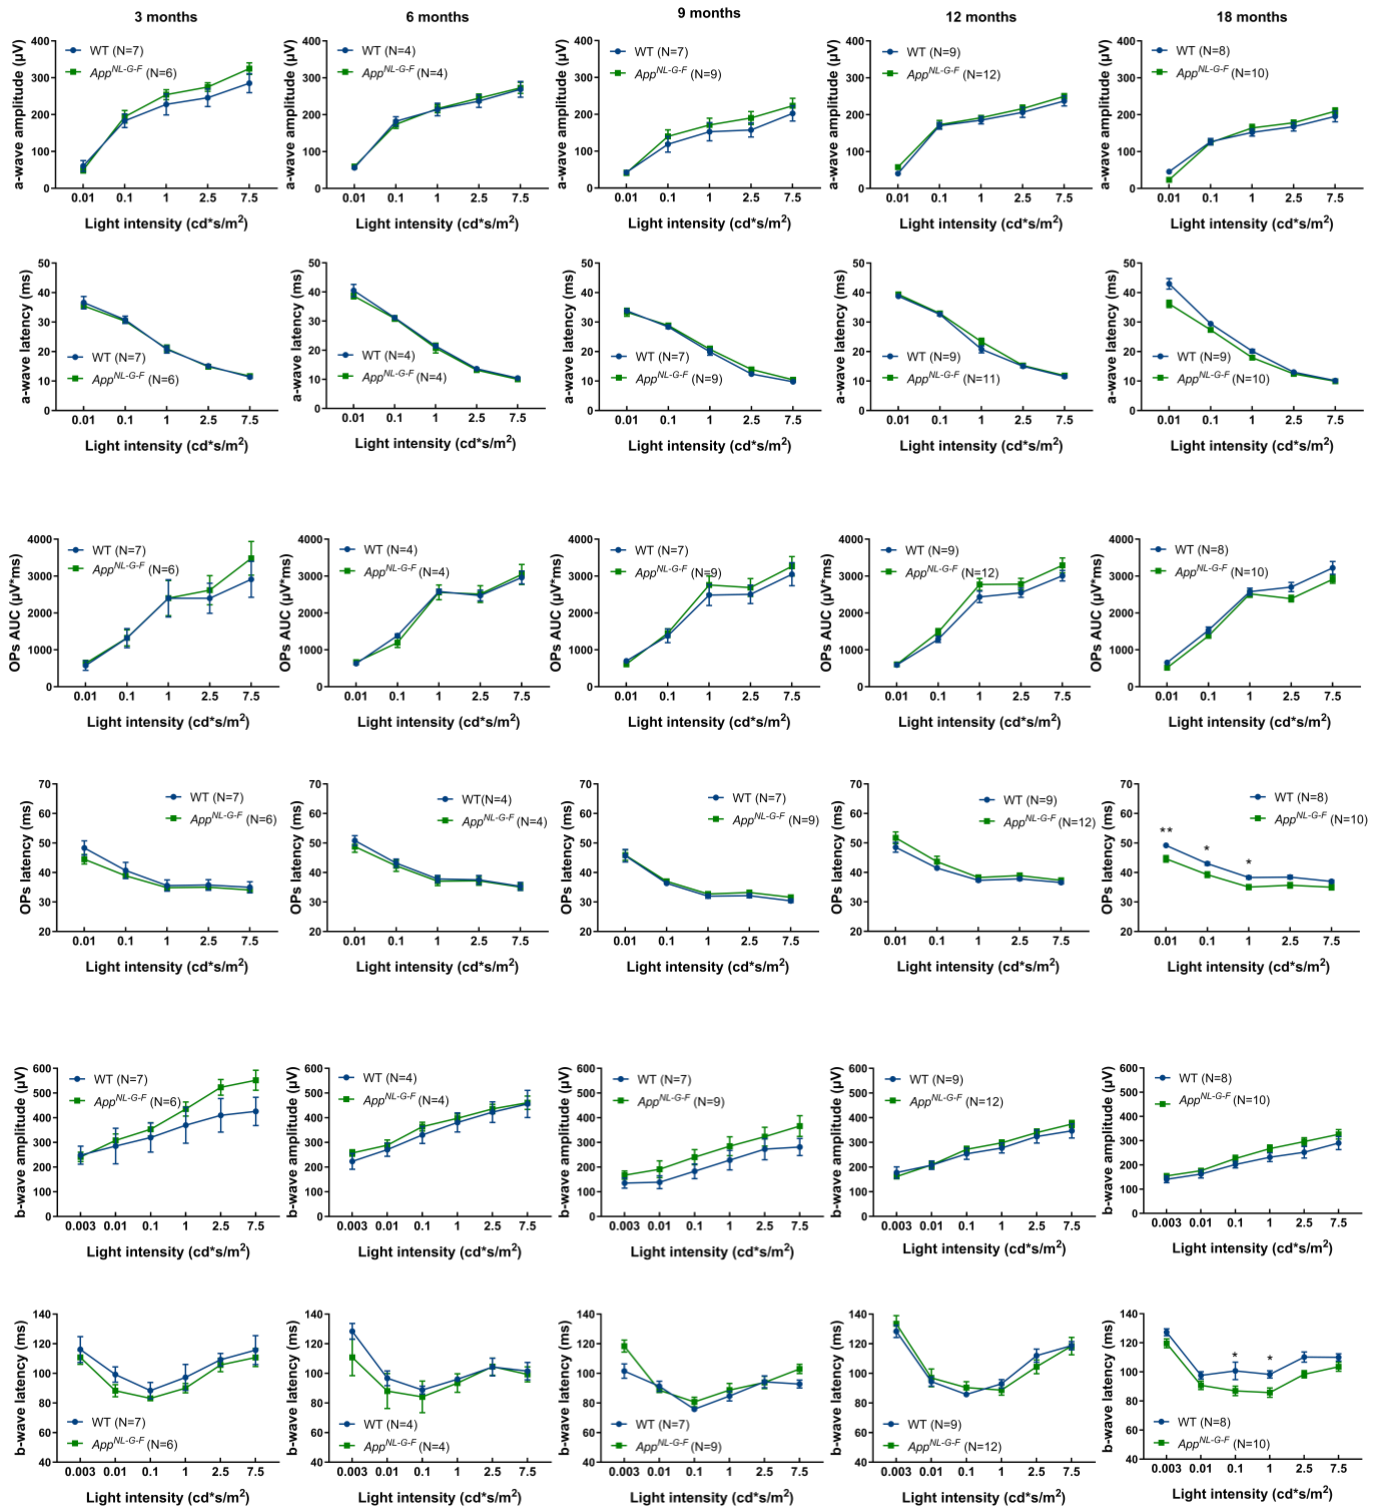

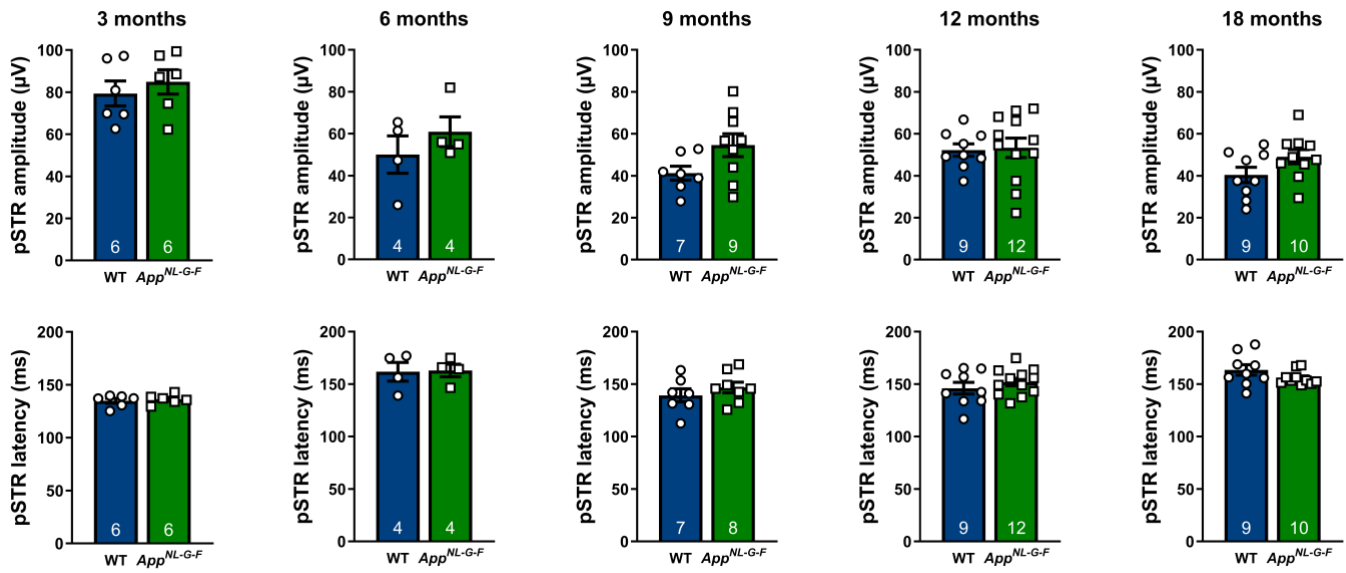

**Supplementary figure 2. Electroretinogram measurements in *App*<sup>NL-G-F</sup> mice.** Electroretinogram measurements were carried out in both *App*<sup>NL-G-F</sup> and WT mice at 3,6,9,12 and 18 months of age. Data are depicted as mean ± SEM; n=4-12 per group.
